# Supplementary material
Source: PubMed Central journal article supplement (PMC7313406)

[Supplementary online-only material for Vister E, Tijjsma ME, Hoang PD, Lord SR: Fatigue, physical activity, quality of life, and fall risk in people with MS. *Int J MS Care*. 2017;19(2):91–98.]

***Supplementary Figure 1. Associations between mean Fatigue Severity Scale (FSS) scores and individual World Health Organization Disability Assessment Schedule scale item scores***

How much difficulty did you have in the past 30 days with standing for long periods such as 30 minutes (A), taking care of your household responsibilities (B), learning a new task (C), joining in community activities (D), being emotionally affected by your health problems (E), concentrating on doing something for 10 minutes (F), walking a long distance such as a kilometer (G), washing your whole body (H), getting dressed (I), dealing with people you do not know (J), maintaining a friendship (K), and your day-to-day work (L).

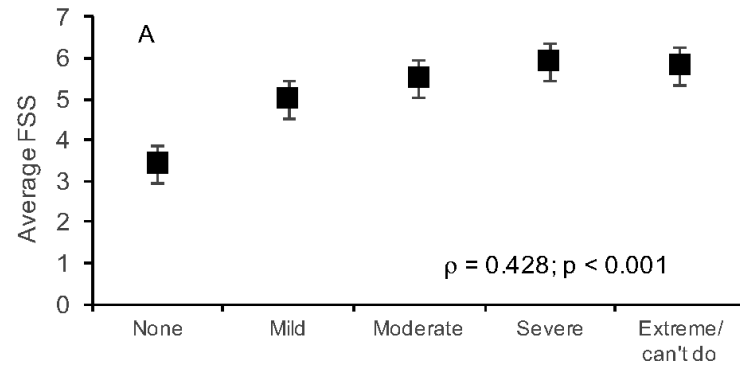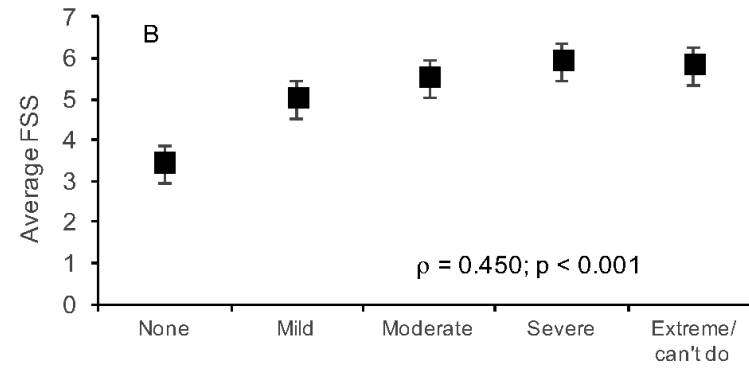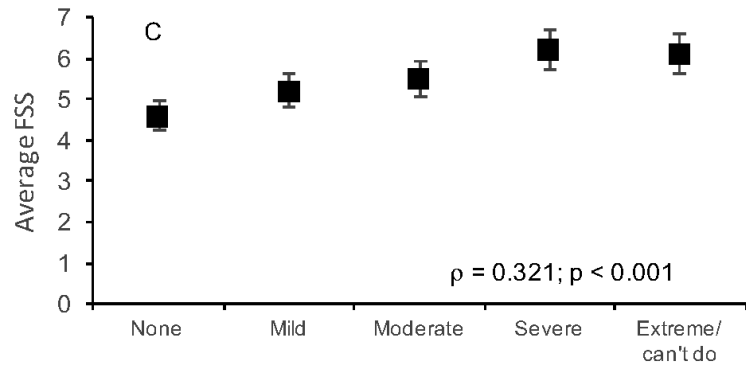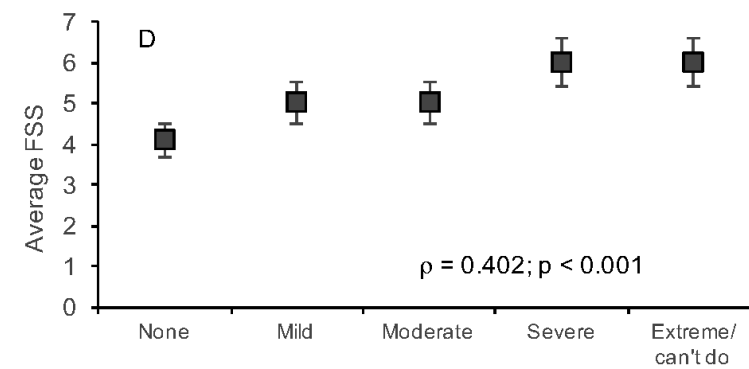

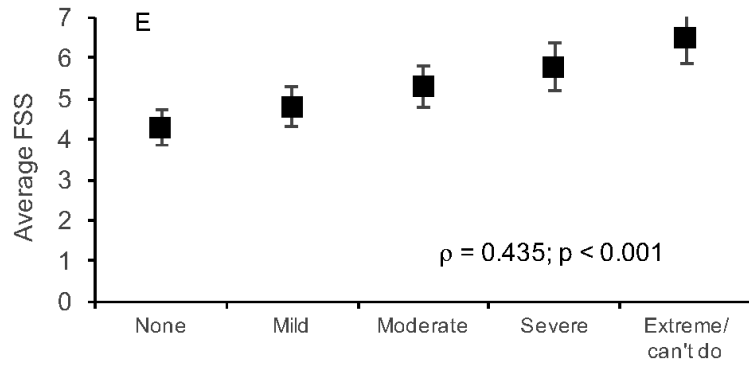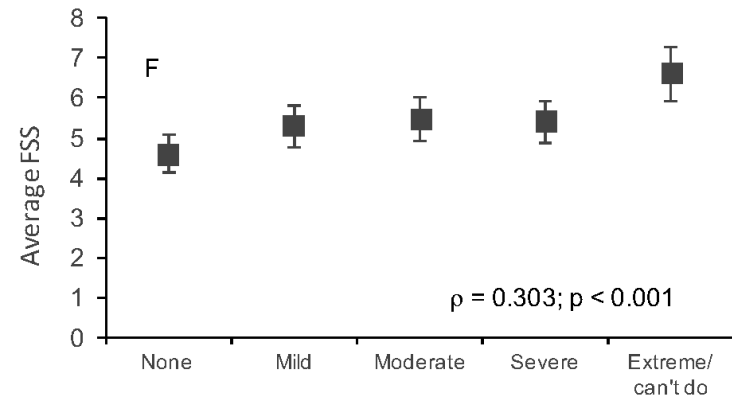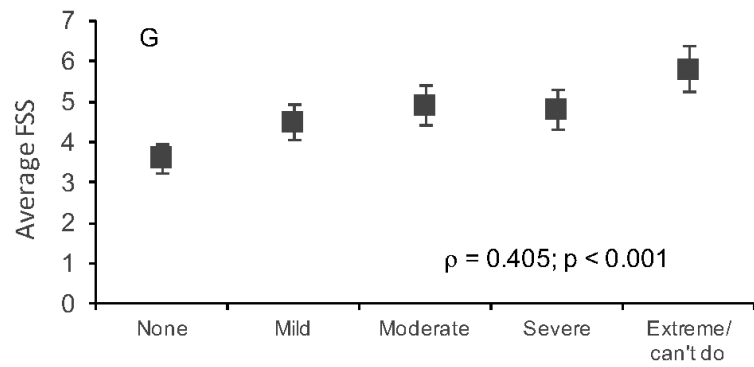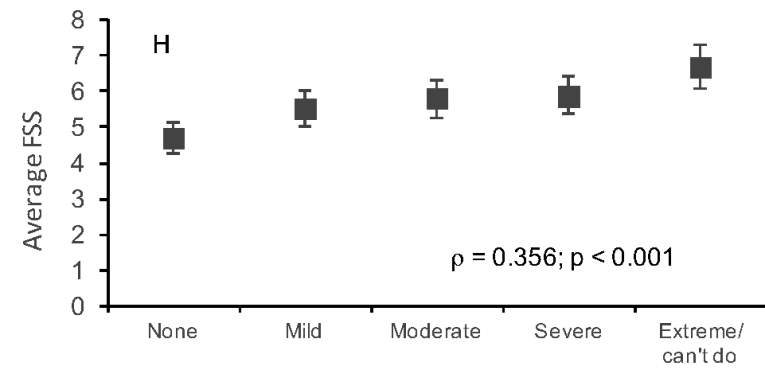

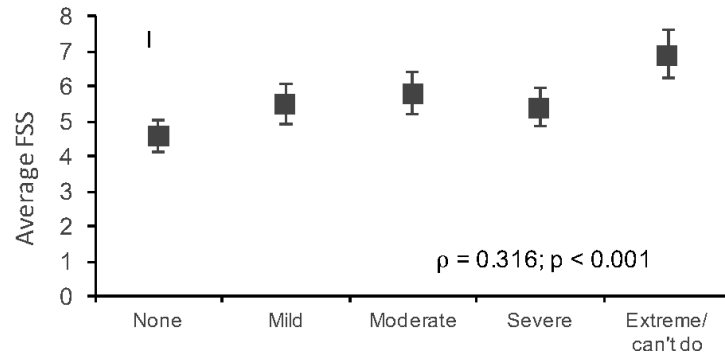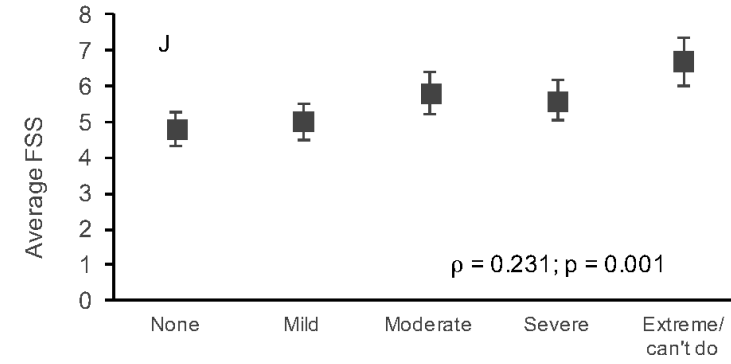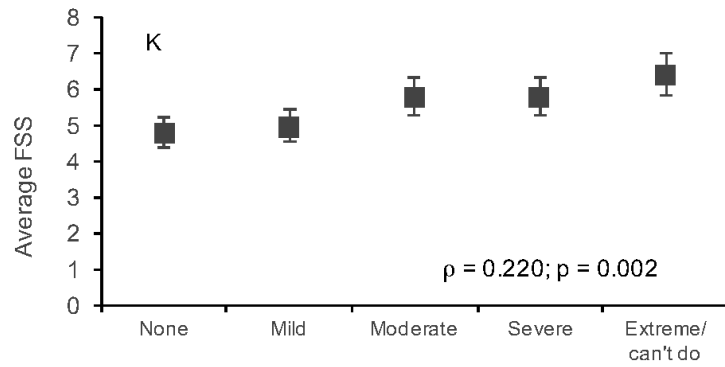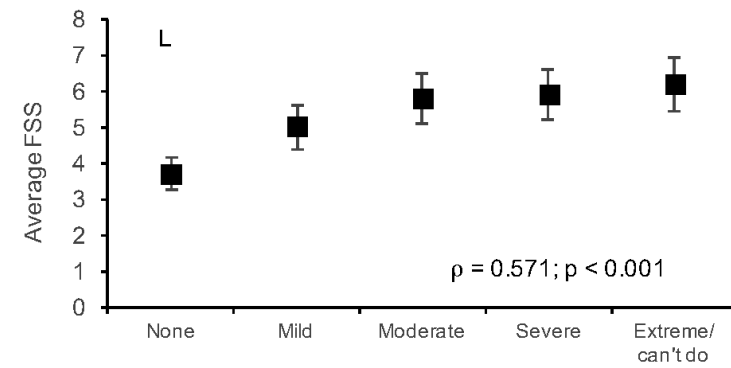

Supplement: 10.7224_2015-077RR_Lord_supplementary_material.pdf [file 10.7224_2015-077RR_Lord_supplementary_material.pdf]
